# Supplementary material for: Wnt signaling alters CTCF binding patterns and global chromatin structure
Source: Research Square preprint supplement (doi:10.21203/rs.3.rs-3878469/v1), 2024-02-13
Supplement: Supplementary file [file 87014c6d495038e610e3164d.pdf]

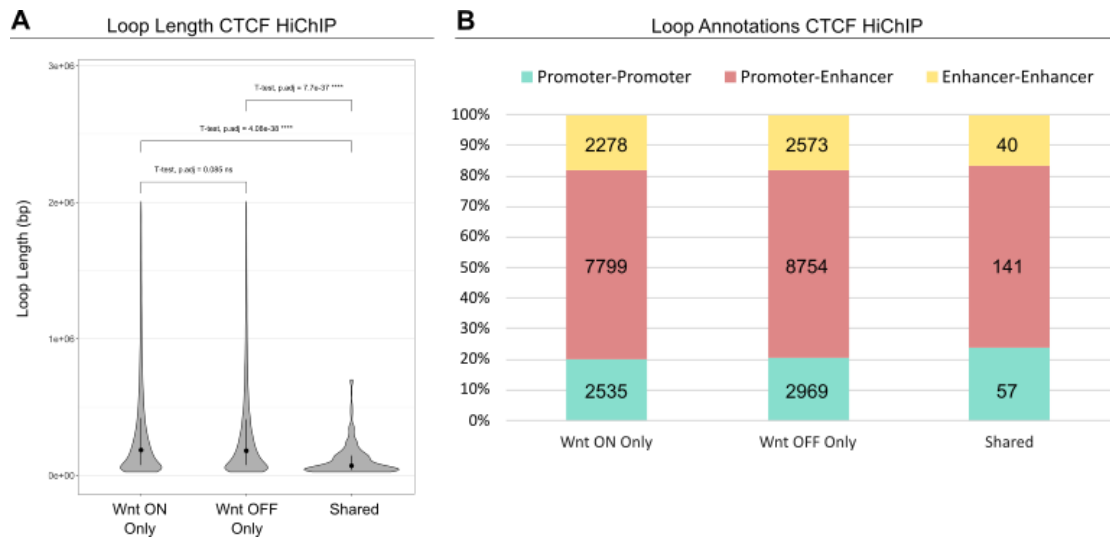

**Supplementary Figure 1. CTCF HiChIP genome-wide analyses. A.** Plot of loop length distribution of Wnt-ON only, Wnt-OFF only and shared loops. Shared loops were significantly shorter than the unique loops. **B.** Loop annotations of CTCF loops across conditions, which were similar in distribution.
